# Supplementary material for: Highly wettable and metallic NiFe-phosphate/phosphide catalyst synthesized by plasma for highly efficient oxygen evolution reaction
Source: Royal Society of Chemistry journal article supplement (doi:10.1039/c8ta01334a), 2018-01-01
Supplement: c8ta01334a1.pdf [file c8ta01334a1.pdf]

Supporting Information

**High Wettable and Metallic NiFe-Phosphate/Phosphide Catalyst Synthesized by Plasma for High Efficient Oxygen Evolution Reaction**

Qixing Zhang,<sup>a</sup> Tiantian Li,<sup>ab</sup> Junhui Liang,<sup>a</sup> Ning Wang,<sup>a</sup> Xiangbin Kong,<sup>a</sup> Jiaou Wang,<sup>c</sup> Haijie Qian,<sup>c</sup> Yurong Zhou,<sup>d</sup> Fengzhen Liu,<sup>d</sup> Changchun Wei,<sup>a</sup> Ying Zhao,<sup>a</sup> Xiaodan Zhang<sup>\*a</sup>

<sup>a</sup>Institute of Photoelectronic Thin Film Devices and Technology of Nankai University, Key Laboratory of Photoelectronic Thin Film Devices and Technology of Tianjin, Key Laboratory of Optical Information Science and Technology of Ministry of Education, Collaborative Innovation Center of Chemical Science and Engineering (Tianjin), Tianjin 300071, P. R. China

\*E-mail: [xdzhang@nankai.edu.cn](mailto:xdzhang@nankai.edu.cn)

<sup>b</sup>School of Physical Science and Technology, Inner Mongolia University, Key Laboratory of Semiconductor Photovoltaic Technology at Universities of Inner Mongolia Autonomous Region, Hohhot 010021, P. R. China.

<sup>c</sup>Institute of High Energy Physics, Chinese Academy of Science, Beijing 100049, P. R. China.

<sup>d</sup>University of Chinese Academy of sciences, Beijing 100049, P. R. China.

## **Experimental details**

### **Materials**

All chemicals and solvents were used as received without further purification. The hydrochloric acid, acetone, ethanol were purchased from sigma. NiFe foams were purchased from Kunshan Tengerhui Electronic Technology Corporation.

### **Catalyst preparation**

Synthesis of NiFePi: The NiFe foam was cleaned using diluted hydrochloric acid (HCl) for 15 min followed by sonication in acetone for 15 min and washing with ethanol and water, and then dried in the air before use. The NiFe foam was placed in the reaction chamber of a plasma-enhanced chemical vapor deposition (PECVD) system followed by  $\text{PH}_3$ , and a  $\text{CO}_2$  plasma treatment was performed at  $280^\circ\text{C}$  for 20 min with a base pressure of 830 mTorr. The conditions for the plasma were as follows:  $\text{PH}_3/\text{CO}_2/\text{H}_2$  (30:10:10 volumetric ratio), a flux of 50 sccm and a power of 150 W.

Synthesis of NiFeP: The NiFe foam was treated with a  $\text{PH}_3$  plasma at  $280^\circ\text{C}$  for 20 min with a base pressure of 830 mTorr. The conditions for the plasma were as follows:  $\text{PH}_3/\text{H}_2$  (40:10 volumetric ratio), a flux of 50 sccm and a power of 50 W.

Synthesis of NiFePi/P: The NiFe foam was managed by  $\text{PH}_3$ ,  $\text{H}_2$  and the  $\text{CO}_2$  plasma treatment was performed at  $280^\circ\text{C}$  for 20 min with a base pressure of 830 mTorr and a power of 150 W, followed by treatment with the  $\text{PH}_3$  and  $\text{H}_2$  plasma for 20 min at that same pressure and a power of 50 W.

### **Catalyst characterization**

Scanning electron microscopy (SEM) was used to characterize the top-down surface

morphology using a Hitachi SU8010 SEM in high vacuum mode. The cross-section energy dispersive spectroscopy (EDS) was performed using a JSM-7610F SEM. X-ray photoelectron spectroscopy (XPS) was performed using a PHI5000 VersaProbe spectrometer. The crystal structures of the samples were characterized using X-ray diffraction (XRD, Philips PANalytical X'Pert Pro) with a copper X-ray source.

### **Electrochemical measurements**

Electrochemical characterization of catalyst is performed in a three-electrode configuration immersed in 1.0 M potassium hydroxide (KOH, pH=13.6). The potential of the working electrode is controlled with a Metrohm Autolab <sub>B.V.</sub> (PGSTAT 204). A Pt counter electrode, an Ag/AgCl reference electrode (saturated KCl and AgCl solution), and catalyst acting as the working electrode form the deployed three-electrode configuration. Linear sweep voltammetry (LSV) measurements with a scan rate of 1 mV s<sup>-1</sup> are carried out to record the current density–potential (*J–E*) data of catalyst. To study the catalytic activity at the semiconductor/electrolyte interface of catalyst, potential EIS measurements were also performed from 10000 Hz to 0.1 Hz at 0.7 mV *vs.* RHE.

### **Electrochemical active surface area (ECSA) estimation**

The active surface area of each catalyst was estimated from their electrochemical capacitance, which can be measured using a simple cyclic voltammetry method. We measured the currents in a narrow potential window with no faradic processes. Therefore, the currents should be primarily due to the charging of the double-layer, which is expected to be linearly proportional to the active surface area. By plotting the

capacitive currents ( $\Delta J$ ,  $J_{\text{anodic}} - J_{\text{cathodic}}$ ) as a function of the scan rate and linearly fitting the data, the double-layer capacitance ( $C_{\text{DL}}$ ) can be estimated as half of the slope.

## Supplementary Figures

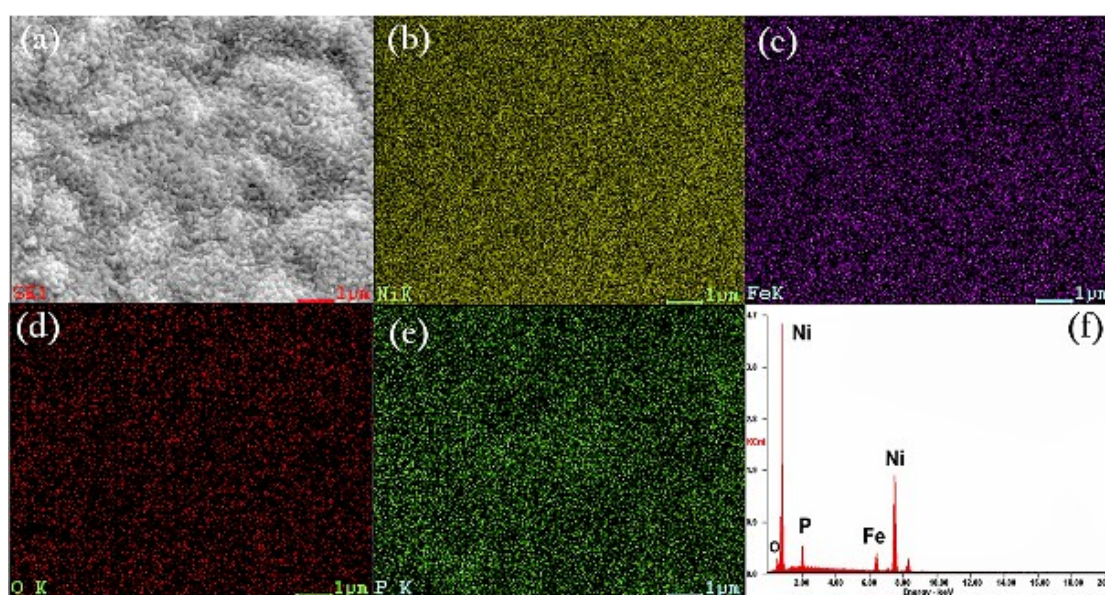

Fig S1. (a) The SEM images and elemental mapping images of (b) Ni, (c) Fe, (d) O, and (e) P. (f)

EDS spectra of the NiFePi/P catalyst.

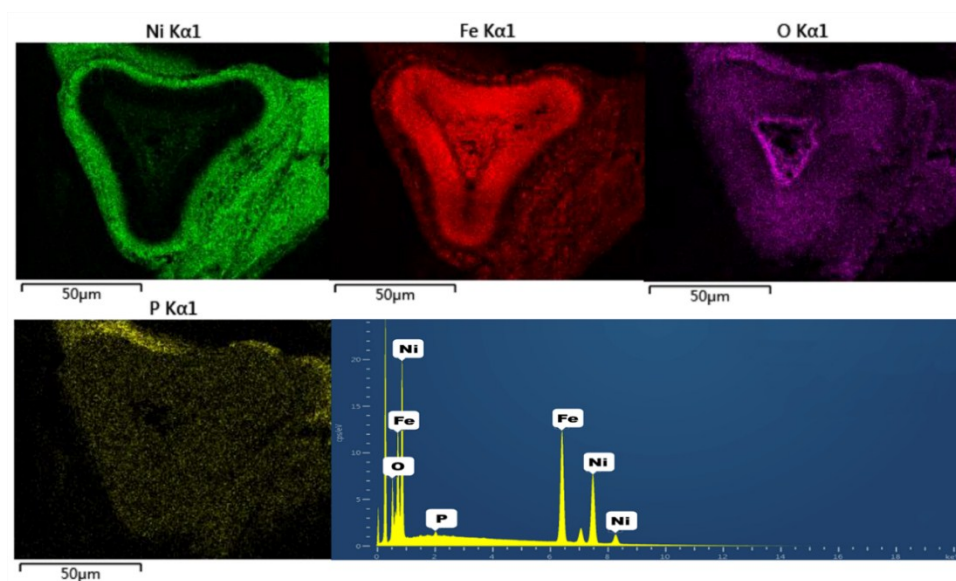

Fig S2. Cross-sectional EDS spectra of the NiFePi/P catalyst.

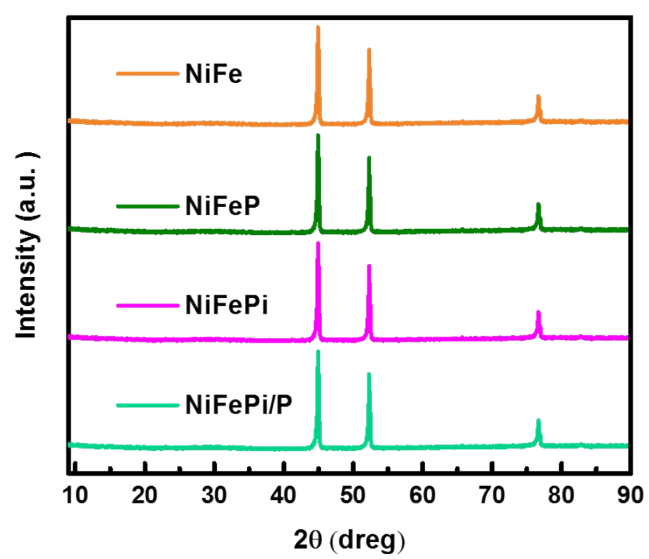

Fig S3. XRD patterns of the NiFePi/P, NiFePi, NiFeP and NiFe catalysts.

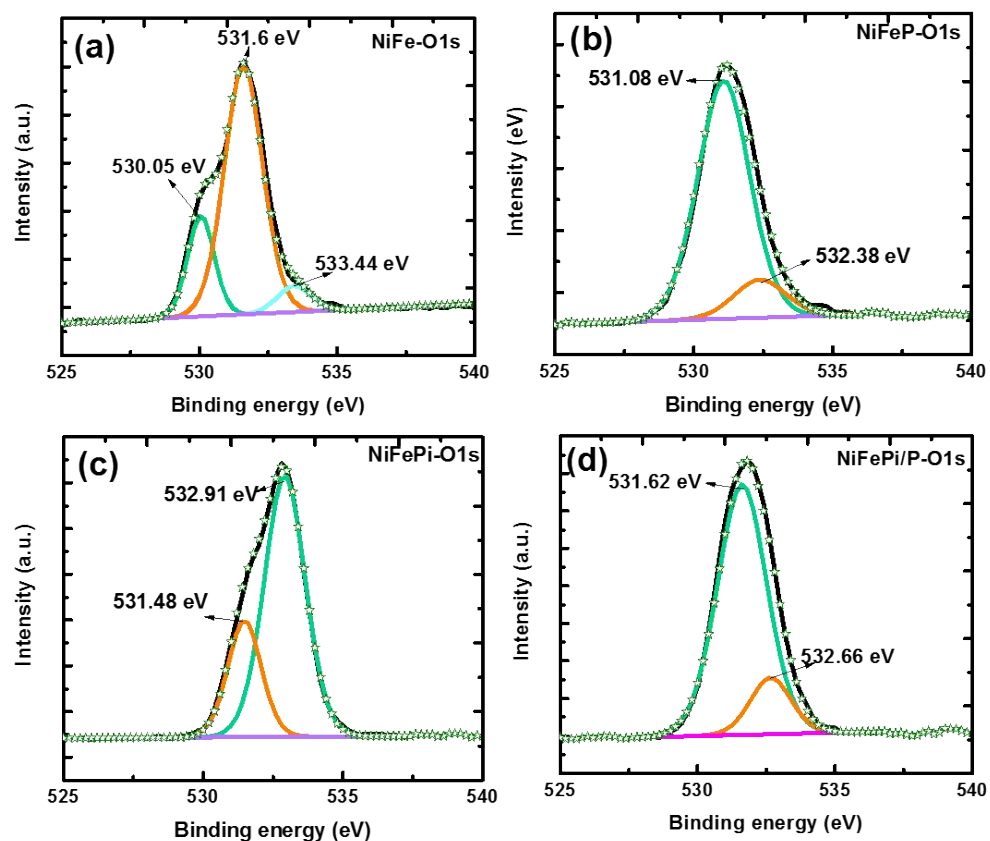

Fig S4. XPS spectra of O1s in (a)NiFe, (b)NiFeP, (c)NiFePi, and (d)NiFePi/P.

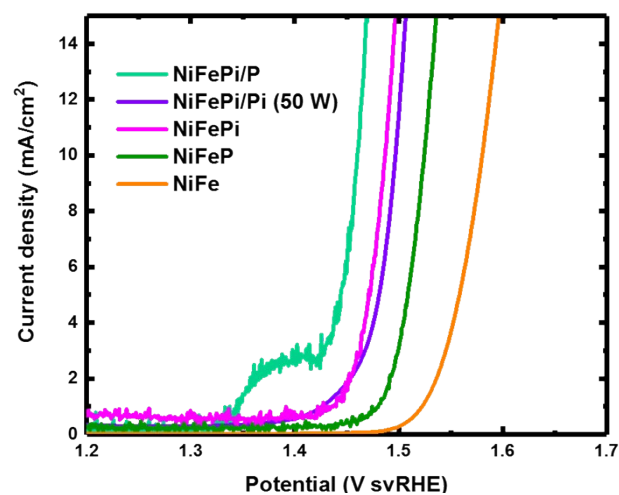

Fig S5. Comparing the LSV curves of NiFePi(prepared at 150 W)/P (prepared at 50 W), NiFePi (prepared at 150 W)/Pi (prepared at 50 W), NiFePi (prepared at 150 W), NiFeP (prepared at 50 W) and NiFe sample.



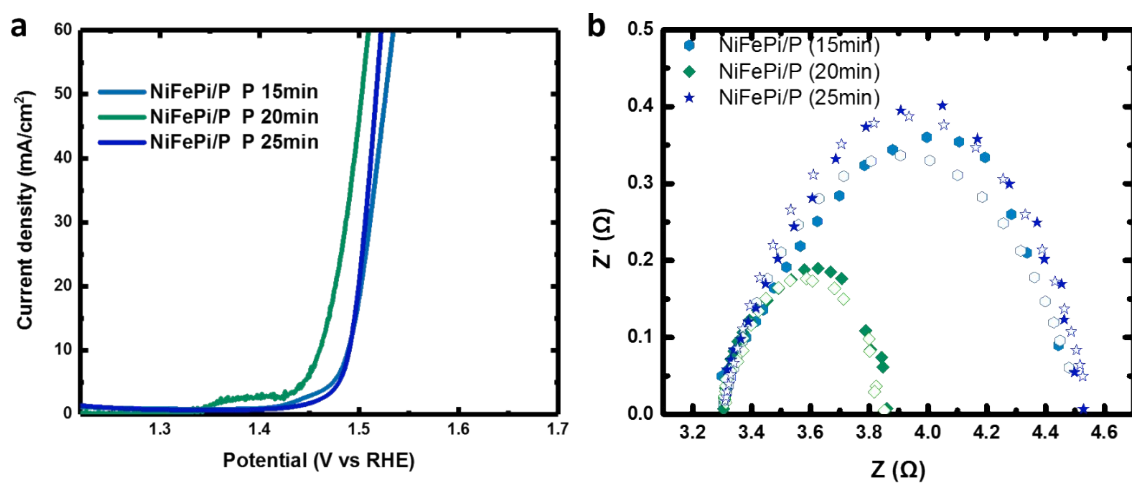

Fig S6. Comparing the (a) LSV curves and (b) EIS curves of NiFePi/P with different P contents: 15min, 20min and 25min by P treatment at a potential of 300 mV versus Ag/AgCl.

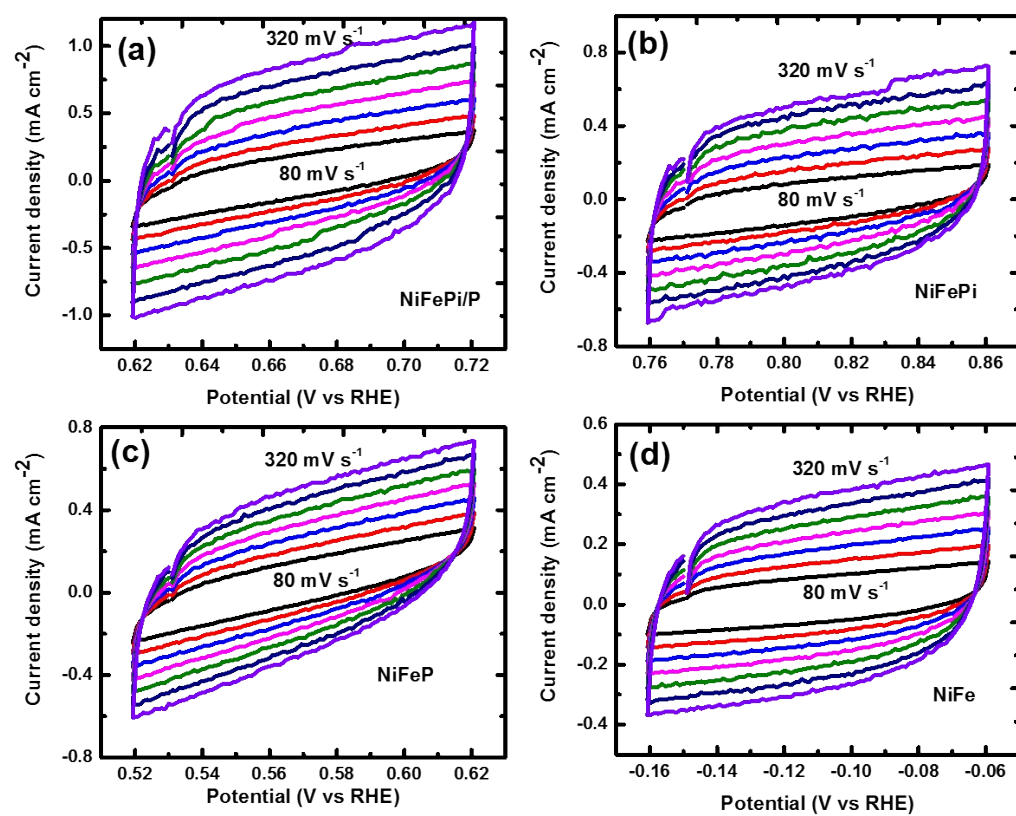

Fig S7. Cyclic voltammograms recorded at various scan rates for (a) NiFePi/P, (b) NiFePi, (c) NiFeP, and (d) NiFe.

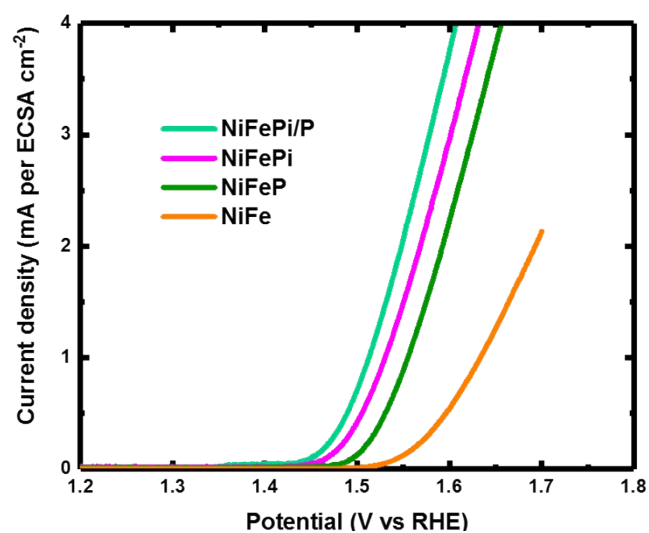

Fig S8. ECSA-normalized polarization curves for each of the four electrocatalysts.

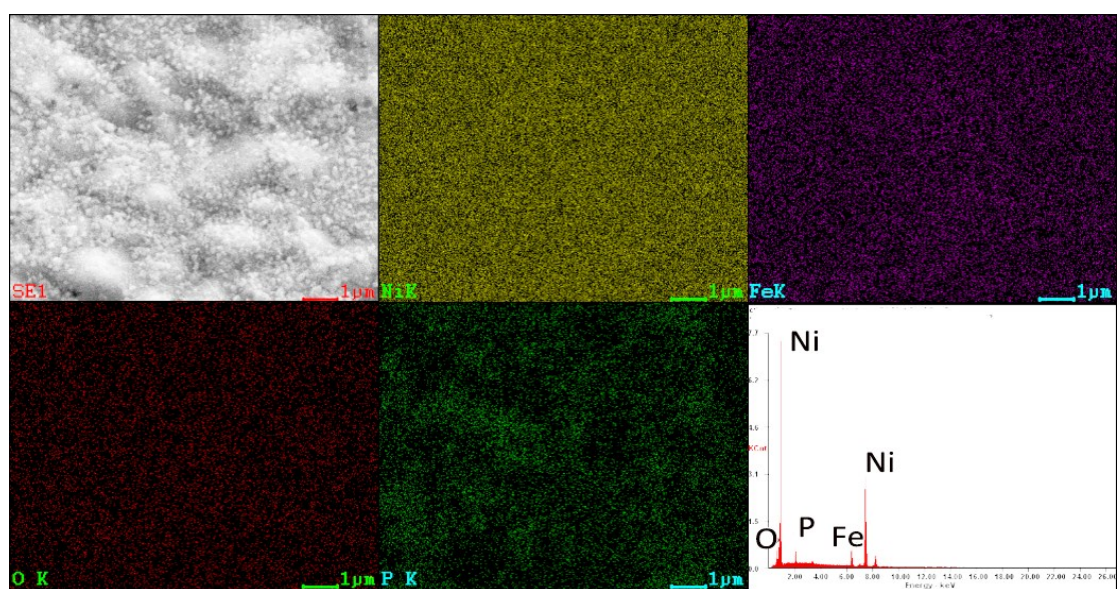

Fig S9. EDS spectra of NiFePi/P after catalysis for 24 hours in 1M KOH.

## Supplementary Tables

**Table S1.** Comparison of the catalytic OER performance of the catalysts developed in this study and other OER catalysts in 1 M KOH.

| Catalyst                    | $\eta$ at 10mA<br>cm <sup>-2</sup> (mV) | Substrate          | Electrolyte | Reference                              |
|-----------------------------|-----------------------------------------|--------------------|-------------|----------------------------------------|
| NiFePi/P                    | 230                                     | NiFe foam          | 1 M KOH     | This work                              |
| NiFe-LDH/CNT                | 247                                     | Carbon fiber paper | 1 M KOH     | J. Am. Chem. Soc. 2013, 135, 8452–8455 |
| Ni-Fe/3D-ErGO               | 259                                     | Au                 | 1M KOH      | J. Mater. Chem. A. 2015, 3, 6921.      |
| NiFeP                       | 270                                     | Ni foam            | 1 M KOH     | ACS Energy Lett. 2017, 2, 1035–1042    |
| NiFe-LDH NP                 | 270                                     | Carbon fiber paper | 1 M KOH     | J. Am. Chem. Soc. 2013, 135, 8452–8455 |
| Fe:Ni(OH) <sub>2</sub> film | 280                                     | Au                 | 1M KOH      | J. Phys. Chem. C 2015, 119, 7243.      |
| NiFeO <sub>x</sub>          | 280                                     | Carbon black       | 1 M KOH     | Langmuir. 2014, 30, 7893–7901          |
| NiFe/NiFePi                 | 290                                     | Carbon fiber paper | 1 M KOH     | ACS Catal. 2017, 7, 2535–2541          |

|                    |     |         |         |                                     |
|--------------------|-----|---------|---------|-------------------------------------|
| NiFe-DH            | 323 | Ni foam | 1 M KOH | ACS Energy Lett. 2017, 2, 1035–1042 |
| NiFeO <sub>x</sub> | 350 | FTO     | 1 M KOH | Nano Research 2015, 8, 23–39        |

LDH represent layered double hydroxide, CNT is carbon nanotubes, NiFe-DH represent NiFe-OH, 3D-ErGO is three-dimensional electrochemically reduced graphene oxide graphene oxide.

Table S2 The ratio of P-O and P-O-P with NiFeP, NiFePi and NiFePi/P samples.

| Samples  | P-O (%) | P-O-P (%) |
|----------|---------|-----------|
| NiFeP    | 86.2    | 13.8      |
| NiFePi   | 26.8    | 73.2      |
| NiFePi/P | 83.3    | 15.7      |

Table S3. The  $R_s$  and  $R_{ct}$  of EIS parameters for different P contents in NiFePi/P.

| Samples           | $R_s$ ( $\Omega$ ) | $R_{ct}$ ( $\Omega$ ) |
|-------------------|--------------------|-----------------------|
| NiFePi/P (15 min) | 3.296              | 1.23                  |
| NiFePi/P (20 min) | 3.290              | 0.57                  |
| NiFePi/P (25 min) | 3.301              | 1.25                  |
